# Supplementary material for: TUBB3 overexpression has a negligible effect on the sensitivity to taxol in cultured cell lines
Source: PubMed Central journal article supplement (PMC5641069; doi:10.18632/oncotarget.17740), 2017-05-10
Supplement: oncotarget-08-71536-s001.pdf [file oncotarget-08-71536-s001.pdf]

# TUBB3 overexpression has a negligible effect on the sensitivity to taxol in cultured cell lines

## Supplementary Materials

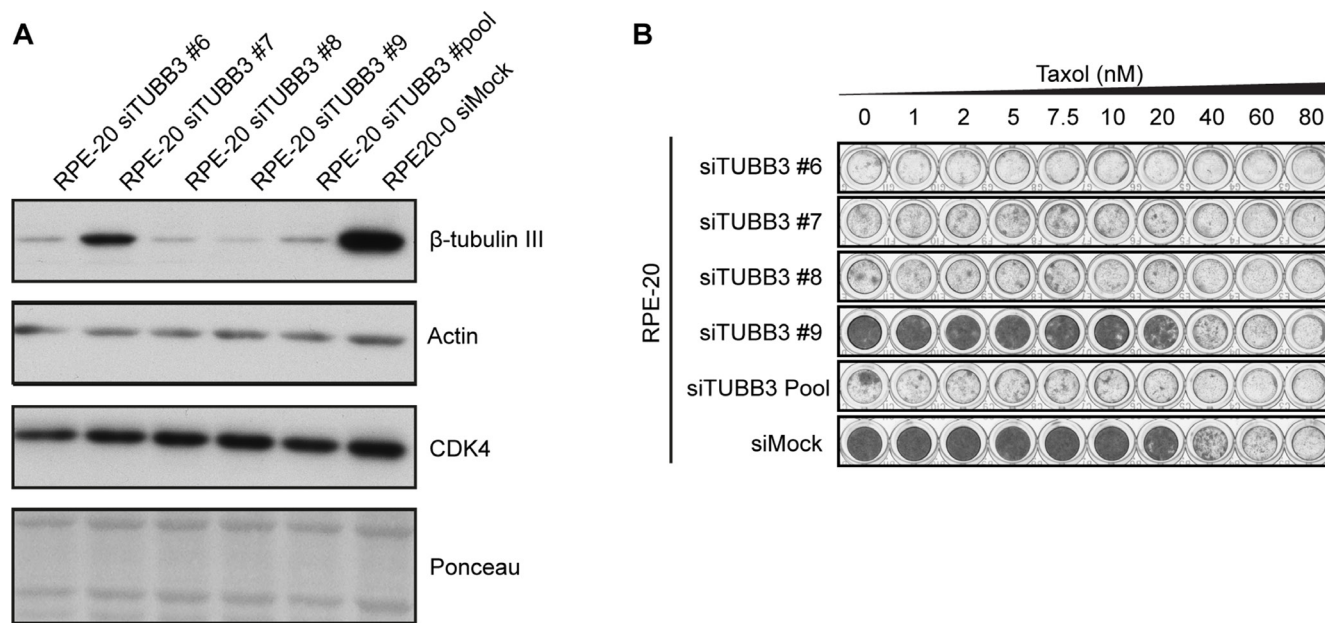

**Supplementary Figure 1: βIII-tubulin knockdown does not affect the sensitivity of RPE-20 to taxol.** (A) Western blot of RPE-20 cells transfected with single siRNAs targeted against TUBB3 for 48 hours. (B) Relative survival plots of RPE-20 cells treated with different doses of taxol for 7 days after knockdown of TUBB3 as described in A).

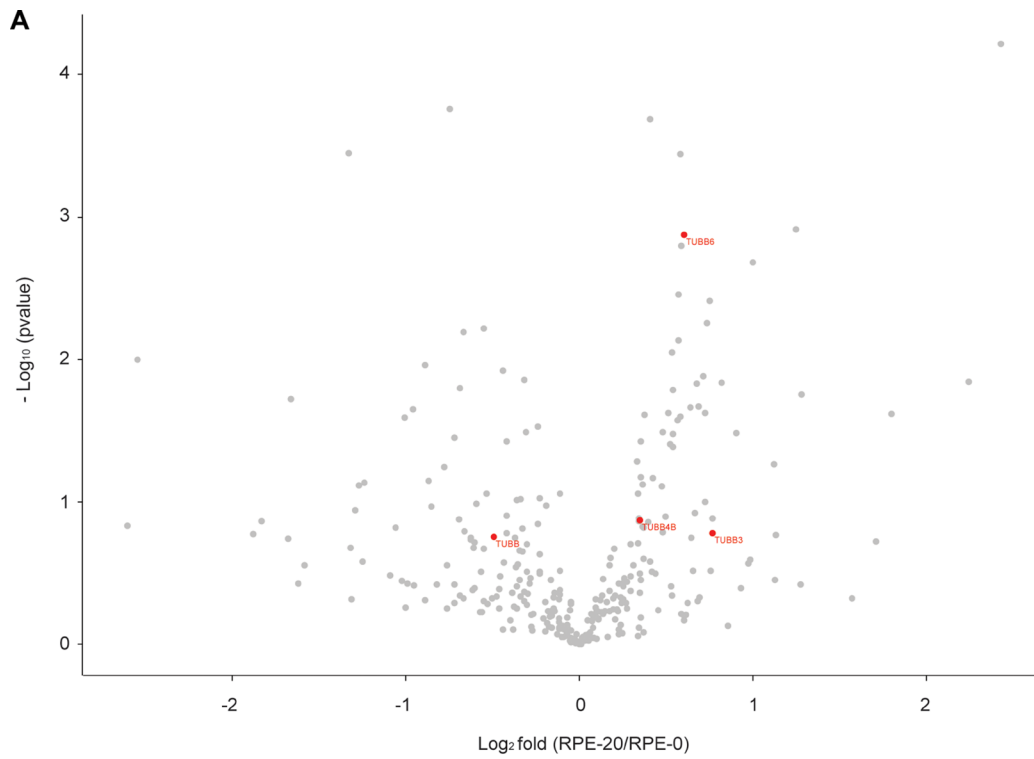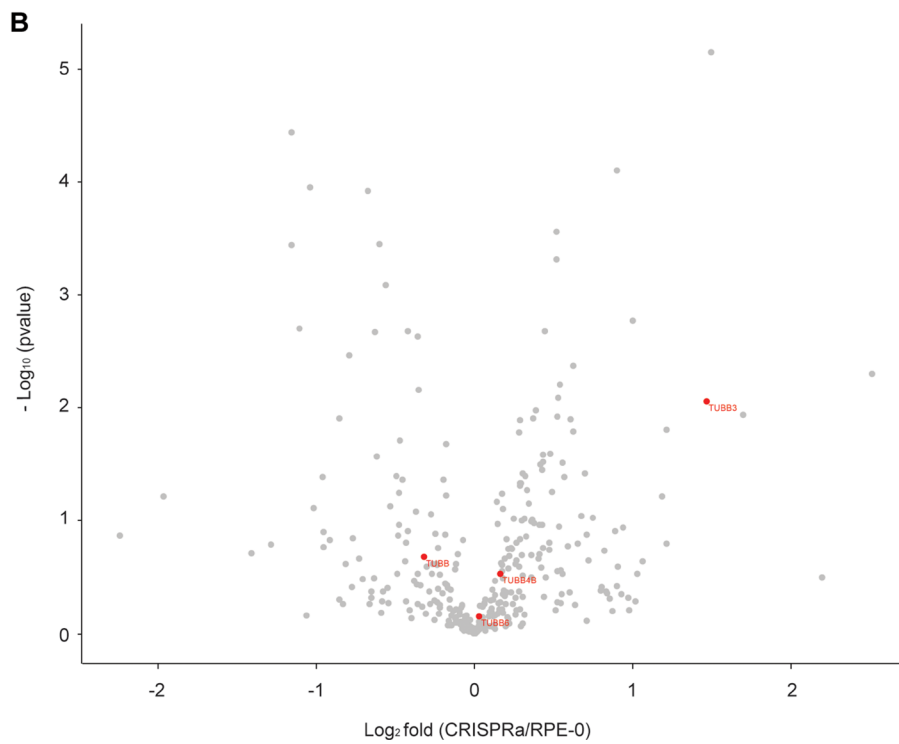

**Supplementary Figure 2: Protein quantification of b-tubulin isotypes by mass spectrometry.** A volcano plot demonstrating magnitude of the protein comparisons between RPE-0 and RPE-20 in (A) and RPE-0 and CRISPRa TUBB3 (exon 3) in (B). The vertical axis indicates  $-\log_{10}(p\text{-value})$ . The horizontal axis indicates  $\log_2$  fold change. The b-tubulin isotypes found are labeled in red. Data was obtained from two sample replicates.

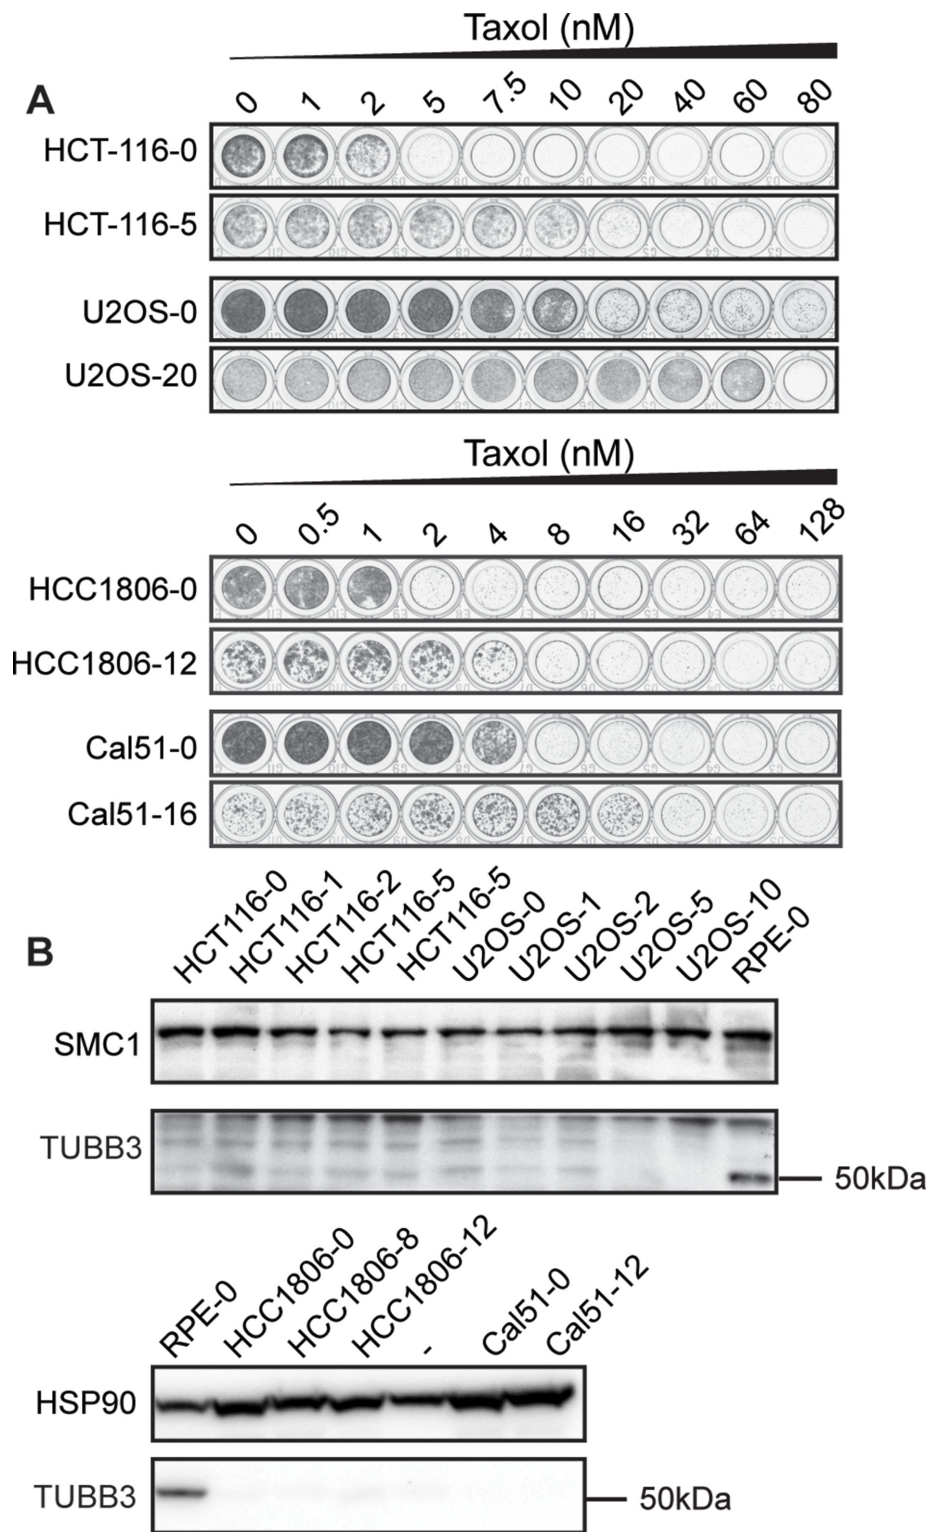

**Supplementary Figure 3: Induction of TUBB3 levels is not observed in multiple taxol-resistant cancer cell lines.** (A) Relative survival plots of taxol-resistant cell lines derived from a colorectal carcinoma (HCT116), an osteosarcoma (U2OS), two triple-negative breast cancer cell lines (HCC1806 and Cal51), and their respective taxol-sensitive parental cell lines. The values added behind the cell lines indicate the concentration of taxol at which the resistant cell lines were grown in (e.g. HCT-116-5 indicates an HCT-116 cell line cultured continuously at 5 nM of taxol). (B) Whole cell lysates prepared from the parental and taxol-resistant cancer cell lines showing their TUBB3 levels.

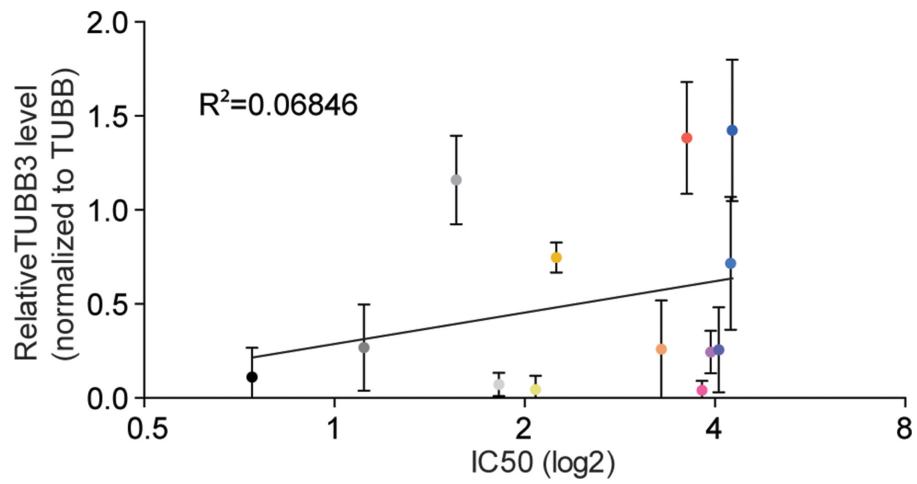

**Supplementary Figure 4: Slight correlation between relative TUBB3 levels and IC50.** The IC50 values were plotted against the relative TUBB3 levels determined for each breast cancer cell line. TUBB3 levels depicted here are averages from three independent experiments and normalized against whole  $\beta$ -tubulin levels.

**Supplementary Table 1: sgRNA target sequences in the putative TSS regions of TUBB3 and ABCB1**

| <b>TUBB3 exon III</b> | <b>Target sequence</b>    | <b>Forward sgRNA oligo</b>    | <b>Reverse sgRNA oligo</b> |
|-----------------------|---------------------------|-------------------------------|----------------------------|
| tubb3-1               | ggagctggctgtggggcgccgtt   | caccggagctggctgtggggcgcc      | aaacggcgccccacagccagctcc   |
| tubb3-2               | ggggctgtctcccagaggagcgtt  | caccggggctgtctcccagaggagc     | aaacgctcctctgggagacagcccc  |
| tubb3-3               | gccccgcgattcgaaagggtt     | caccgccccgcgattcgaaagg        | aaacctttcgatcgcgggggc      |
| tubb3-5               | ggtgctgggtgtctctaaacgtt   | caccggtgctgggtgtctctaaac      | aaacgttagagaccaaccgcacc    |
| tubb3-6               | gttgctctaaaccggcgtt       | caccgttgctctaaaccggcgt        | aaacacgccgttagagaccaac     |
| tubb3-8               | gcggaaccgagaggtagcgtt     | caccgccaaccgagaggtagc         | aaacgctacctctcgttccgc      |
| tubb3-9               | ggggatccttgctgaggaggtt    | caccgggatccttgctgaggag        | aaacctcccgagccaaggatcccc   |
| <b>TUBB3 exon I</b>   |                           |                               |                            |
| tubb3-a               | tgctgaagttgctgggtggagg    | caccgtgctgaagttgctgggtggagg   | aaacctccaccgcaaaactcaagcac |
| tubb3-b               | gaaaggagctccggaaaacgtgg   | caccgaaaggagctccggaaaacgtgg   | aaaccacgtttccgggactccttc   |
| tubb3-d               | ggagtgaggaggtccaaccagg    | caccggagtgaggaggtccaaccagg    | aaacctggtgggacctccactcc    |
| tubb3-e               | agcctagagggaaggacgagcagg  | caccgagcctagagggaaggacgagcagg | aaacctgctcgtccttcttaggctc  |
| tubb3-f               | agctaggacagcgtcaagagtg    | caccgagctaggacagcgtcaagagtg   | aaacctcttgactgctgcttagctc  |
| <b>ABCB1</b>          |                           |                               |                            |
| abcb1-1               | gtagctcctctctgtactgtt     | caccgtagctcctctctgtact        | aaacagtaccagaggaggagctac   |
| abcb1-2               | gtgttatcccagtagcagggtt    | caccgtgttatcccagtagcagg       | aaacctctgtagctgggataaacac  |
| abcb1-3               | gaggagctacatgaactaaggcgtt | caccgaggagctacatgaactaaggc    | aaacgccttagtcatgtagctctc   |
| abcb1-4               | gctacatgaactaaggcaggcgtt  | caccgctacatgaactaaggcaggc     | aaacgcctgcttagtcatgtagc    |
| abcb1-5               | gcactaatcagtgaaaaccaggtt  | caccgcaataatcagtgaaaaccag     | aaactgggtttcactgattagtc    |
| abcb1-6               | gaaaaccaaggataagttgtt     | caccgaaaaccaaggataagtt        | aaacaaactatccttgggtttc     |
| abcb1-7               | gataagttgggtggaggaagggtt  | caccgataagttgggtggaggaagg     | aaacctctcctccaccaaaactatc  |
| abcb1-8               | gtgatcttttgtaaggtgtt      | caccgtgatcttttgtaaggtgt       | aaacacaccttagcaaaaagatcac  |
| abcb1-9               | gagttacatgcttaggatgtt     | caccgagttacatgcttaggat        | aaacatccctaaacctgtaactc    |
| abcb1-10              | gttgagaagtttagcagaatgtt   | caccgttgagaagtttagcagaat      | aaacattctgctaaacttcaac     |

**Supplementary Table 2:  $\beta$ -tubulin isoforms and ABCB1 RT-qPCR oligos**

|                                         | <b>Forward oligo</b> | <b>Reverse oligo</b> |
|-----------------------------------------|----------------------|----------------------|
| <b>TUBB/tubulin beta class I</b>        | GCCTTCCTCCACTGGTACAC | GCCTCCTCACCGAAATCCTC |
| <b>TUBB1/ tubulin beta 1 class VI</b>   | GCTTCCAGATCGTCCACTCC | GTCCGACACCTTGGGAGAAG |
| <b>TUBB2A/tubulin beta 2A class Iia</b> | CTGAAGATGTCGGCCACCTT | CGGTGAACTCCATCTCGTCC |
| <b>TUBB2B/tubulin beta 2B class Iib</b> | CTGAAGATGTCGGCCACCTT | CGGTGAACTCCATCTCGTCC |
| <b>TUBB3/tubulin beta 3 class III</b>   | GCCTCAAGATGTCCTCCACC | CGGTGAACTCCATCTCGTCC |
| <b>TUBB4A/tubulin beta 4A class Iva</b> | GACTCTGGAAACCGCACCTT | TCAGAGGGAGGGGTCAAACA |
| <b>TUBB6/tubulin beta 6 class V</b>     | TCCACCTTCATCGGCAACAG | TTTCATCCATGCCCTCACCC |
| <b>TUBB8/tubulin beta 8 class VIII</b>  | GCCTTCCTCCACTGGTACAC | CTCCTCCTCGGCATACTCCT |
| <b>ABCB1</b>                            | CAGTTGAGTGGTGGGCAGAA | GCCTTATCCAGAGCCACCTG |
